# Supplementary material for: Fetal development of subcutaneous white adipose tissue is dependent on Zfp423
Source: PubMed Central journal article supplement — Mol Metab. 2016 Nov 21;6(1):111–24. doi: 10.1016/j.molmet.2016.11.009 (PMC5220400; doi:10.1016/j.molmet.2016.11.009), 2016-11-21
Supplement: mmc1.pdf [file mmc1.pdf]

**Supplemental Table 1**

qPCR primer sequences used in this study

| Gene                            | Forward 5'-3'           | Reverse 5'-3'          |
|---------------------------------|-------------------------|------------------------|
| <i>Zfp423</i>                   | CAGGCCCAAGAAGAACAAG     | GTATCCTCGCAGTAGTCGCACA |
| <i>Ppar<math>\gamma</math>2</i> | GCATGGTGCCTTCGCTGA      | TGGCATCTCTGTGTCAACCATG |
| <i>C/ebp<math>\alpha</math></i> | TGGCCTGGAGACGCAATGA     | CGCAGAGATTGTGCGTCTTT   |
| <i>Adiponectin</i>              | AGATGGCACTCCTGGAGAGAA   | TTCTCCAGGCTCCTTTTCT    |
| <i>Fabp4</i>                    | GATGAAATCACCGCAGACGAC   | ATTCCACCACCAGCTTGTCAC  |
| <i>Lpl</i>                      | CATCGAGAGAGGATCCGAGTGAA | TGCTGAGTCCTTTCCCTTCTG  |
| <i>Irs1</i>                     | CGATGGCTTCTCAGACGTG     | CAGCCCGCTTGTTGATGTTG   |
| <i>Ucp1</i>                     | TCTCAGCCGGCTTAATGACTG   | GGCTTGCATTCTGACCTTAC   |
| <i>Cidea</i>                    | TCCTATGCTGCACAGATGACG   | TGCTCTTCTGTATCGCCCAGT  |
| <i>Prdm16</i>                   | ACACGCCAGTTCTCCAACCTGT  | TGCTTGTTGAGGGAGGAGGTA  |
| <i>F4/80</i>                    | TGACTCACCTTGTGGTCCTAA   | CTTCCAGAATCCAGTCTTTCC  |
| <i>Cd115</i>                    | TGTCATCGAGCCTAGTGGC     | CGGGAGATTCAGGGTCCAAG   |
| <i>Cd11b</i>                    | GGCTCCGGTAGCATCAACAA    | ATCTTGGGCTAGGGTTTCTCT  |
| <i>Rps18</i>                    | CATGCAAACCCACGACAGTA    | CCTCACGCAGCTTGTTGTCTA  |

## Supplemental Figure Legends

### Supplemental Figure 1: Inactivation of *Zfp423* in the *Pdgfra* lineage leads to growth defects including arrested adipose tissue development.

(A) Representative photograph of control and *Pdgfra*<sup>Lin</sup>-Zfp423-KO mice at 3 weeks of age.

(B) Representative photographs and/or average depot mass of inguinal WAT (iWAT) gonadal WAT (gWAT), and interscapular brown adipose tissue (BAT) isolated from 3 weeks-old control and *Pdgfra*<sup>Lin</sup>-Zfp423-KO mice.

(C) Relative mRNA levels of the indicated adipocyte-selective genes in iWAT isolated from 3 weeks-old control and *Pdgfra*<sup>Lin</sup>-Zfp423-KO mice. \* denotes  $p < 0.05$  from student's t-test.  $n=4-5$  mice

(D) Relative mRNA levels of the indicated adipocyte-selective genes in gWAT isolated from 3 weeks-old control and *Pdgfra*<sup>Lin</sup>-Zfp423-KO mice. \* denotes  $p < 0.05$  from student's t-test.  $n=4-5$  mice

### Supplemental Figure 2: Cre activity in *Adiponectin*-Cre mice occurs in a subset of *Pdgfra*<sup>+</sup> adipose precursor cells present in fetal inguinal WAT.

(A) *Pdgfra*<sup>+</sup>; *Lin*<sup>-</sup> (CD31<sup>-</sup>; CD45<sup>-</sup>) cells were analyzed in the adipose stromal vascular fraction isolated from reporter mice carrying *Adiponectin*-Cre and *Rosa26R*<sup>loxP-stop-loxP-tdtomato</sup> alleles.

(B) Representative FACS collection gate for the isolation of *Pdgfra*<sup>+</sup>; *Lin*<sup>-</sup> cells is shown.

(C) Gating strategy to assess the frequency of tdTomato<sup>+</sup>; *Pdgfra*<sup>+</sup>; *Lin*<sup>-</sup> cells. Cells from mice carrying only the *Rosa26R*<sup>loxP-stop-loxP-tdtomato</sup> allele were used as negative controls.

(D) Representative dot plot highlighting the presence of tdTomato<sup>+</sup>; *Pdgfra*<sup>+</sup>; *Lin*<sup>-</sup> cells in the stromal vascular fraction of iWAT from E18.5 *Adiponectin*-Cre; *Rosa26R*<sup>loxP-stop-loxP-tdtomato</sup> embryos.

(E) Representative dot plot highlighting the number of tdTomato<sup>+</sup> cells expressing the adipose precursor marker, *Pdgfra*, in the stromal vascular fraction of iWAT from E18.5 *Adiponectin*-Cre; *Rosa26R*<sup>loxP-stop-loxP-tdtomato</sup> embryos.

(F,G) Representative dot plot highlighting the presence of tdTomato<sup>+</sup>; *Pdgfra*<sup>+</sup>; *Lin*<sup>-</sup> cells in the stromal vascular fraction of iWAT (f) and gWAT (g) from 8 weeks-old *Adiponectin*-Cre; *Rosa26R*<sup>loxP-stop-loxP-tdtomato</sup> mice.

(H) Representative dot plot highlighting the presence of tdTomato<sup>+</sup>; *Pdgfra*<sup>+</sup>; *Lin*<sup>-</sup> cells in the stromal vascular fraction of gWAT from 6 day-old (P6) *Adiponectin*-Cre; *Rosa26R*<sup>loxP-stop-loxP-tdtomato</sup> pups.

**Supplemental Figure 3: Gross defects in the terminal differentiation of adipocytes in *Adiponectin-Cre; Zfp423<sup>loxP/loxP</sup>* mice are restricted to the inguinal adipose depot.**

**(A)** Relative mRNA levels of common adipocyte-selective genes and thermogenic genes in iWAT from 8 weeks-old control and Zfp423-AKO mice. \* denotes  $p < 0.05$  student's test.  $n=6$  mice.

**(B)** Relative mRNA levels of thermogenic genes in fractionated iWAT adipocytes from 8 weeks-old control and Zfp423-AKO mice.  $n=5$  mice.

**(C)** Relative mRNA levels of common adipocyte-selective genes and thermogenic genes in gWAT from 8 weeks-old control and Zfp423-AKO mice. \* denotes  $p < 0.05$  student's test.  $n=6$  mice.

**(D)** Relative mRNA levels of common adipocyte-selective genes and thermogenic genes in the interscapular BAT depot from 8 weeks-old control and Zfp423-AKO mice. \* denotes  $p < 0.05$  student's test.  $n=6$  mice.

**(E-H)** Representative H&E staining of gWAT **(E,F)** and BAT sections **(G,H)** obtained from 8 weeks-old control and Zfp423-AKO mice. Scale bar, 200  $\mu\text{m}$ .

**Supplemental Figure 4: Pathological remodeling of both inguinal and gonadal adipose tissue in *Adiponectin-Cre; Zfp423<sup>loxP/loxP</sup>* mice upon high-fat diet feeding.**

**(A)** Average adipocyte size in control and Zfp423-AKO iWAT after 8 weeks of HFD feeding. N.S. denotes not significant by student's test.  $n=6-8$  mice.

**(B,C)** Representative immunofluorescence images of Perilipin (green) and F4/80 (red) expression in sections of gWAT from control and Zfp423-AKO mice after 8 weeks of HFD feeding. Scale bar, 200  $\mu\text{m}$ .

**(D,E)** Relative mRNA levels of macrophage markers **(D)** and adipocyte-selective genes **(E)** in control and Zfp423-AKO gWAT after 8 weeks of HFD feeding. \* denotes  $p < 0.05$  student's test.  $n=6$  mice.

**(F)** Western blot analysis of phosphorylated-Akt (p-Akt) and total Akt protein levels in tissue extracts of gWAT and iWAT from 8-week HFD fed control and Zfp423-AKO mice administrated with insulin (2U/kg).

**(G)** Western blot analysis of serum adiponectin in control and Zfp423-AKO mice fed with chow, 8 or 16 weeks of HFD. For quantification, intensity of adiponectin band is normalized to that of the IgG band. \* denotes  $p < 0.05$  by two-way ANOVA.  $n=4$  mice.

**Supplemental Figure 5: Transient exposure of doxycycline to fetal *Adiponectin*-rtTA; TRE-Cre; *Zfp423*<sup>loxP/loxP</sup> animals leads to inguinal white adipose depot-selective targeting of *Zfp423* (*Zfp423*-fetalAKO mice)**

**(A-C)** Relative mRNA levels of *Zfp423* and other adipocyte genes in iWAT **(A)**, gWAT **(B)**, and BAT **(C)** of 5 weeks-old *Adiponectin*-rtTA; TRE-Cre; *Zfp423*<sup>loxP/loxP</sup> mice exposed to doxycycline from E16 to P5. \* denotes p < 0.05 student's test. n=6 mice.

**(D-I)** Representative H&E staining of iWAT **(D,E)**, gWAT **(F,G)**, and BAT **(H,I)** sections obtained from 5 weeks-old control and *Zfp423*-fetalAKO mice. Scale bar, 200  $\mu$ m.

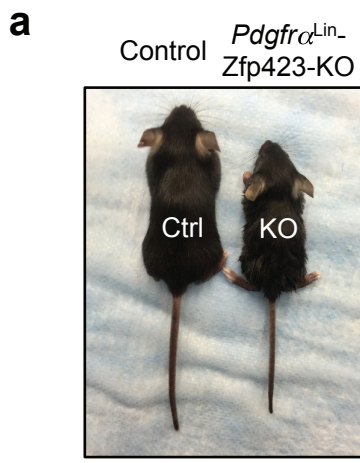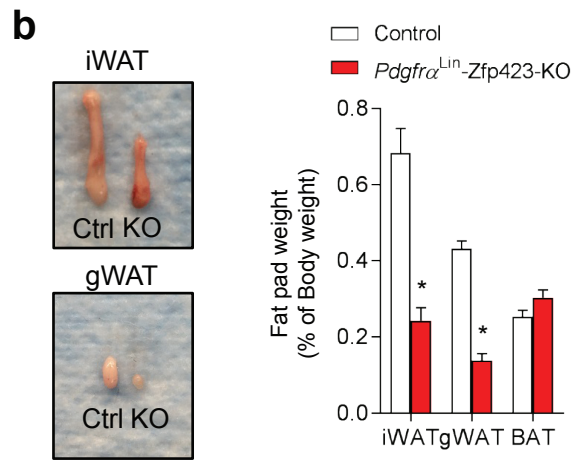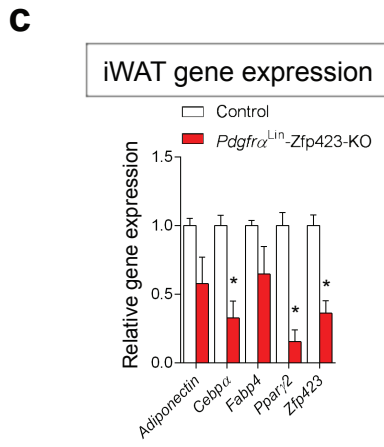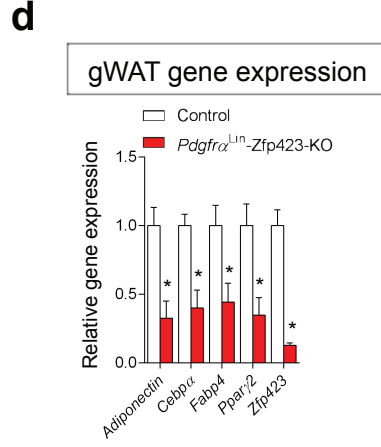

Supplementary Figure 1

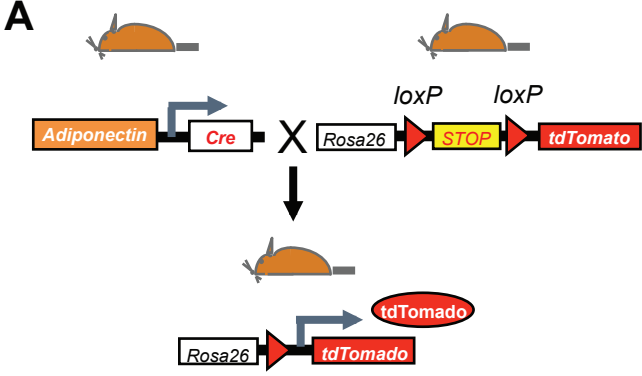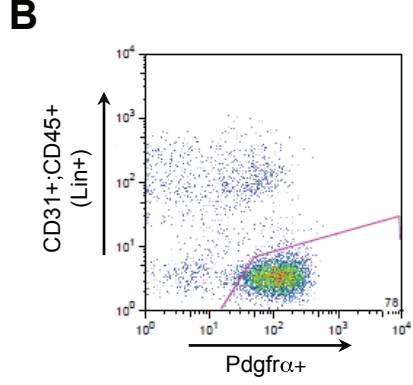

**C** *Rosa26R<sup>loxP-stop-loxP-tdTomato</sup>*

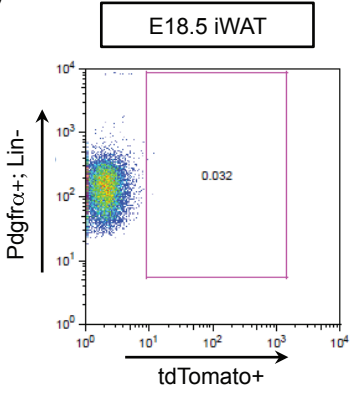

**D** *Adiponectin-Cre; Rosa26R<sup>loxP-stop-loxP-tdTomato</sup>*

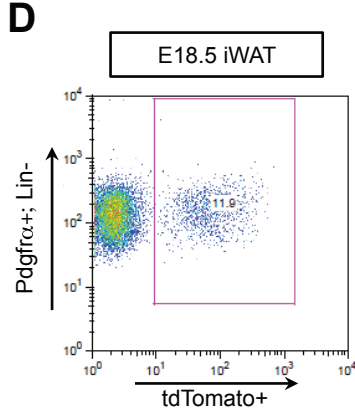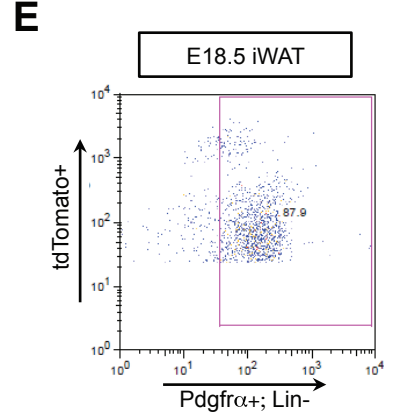

**F** *Adiponectin-Cre; Rosa26R<sup>loxP-stop-loxP-tdTomato</sup>*

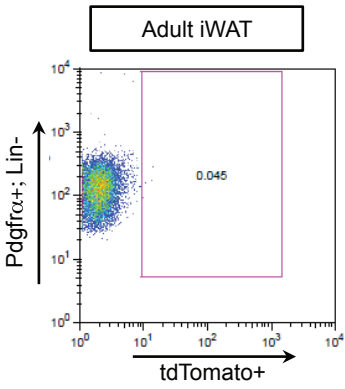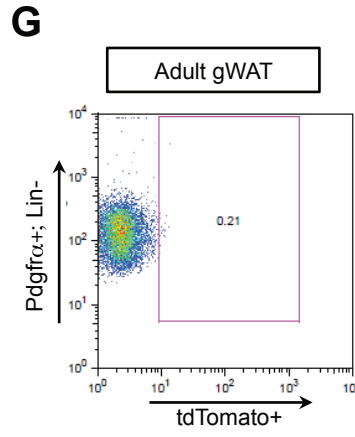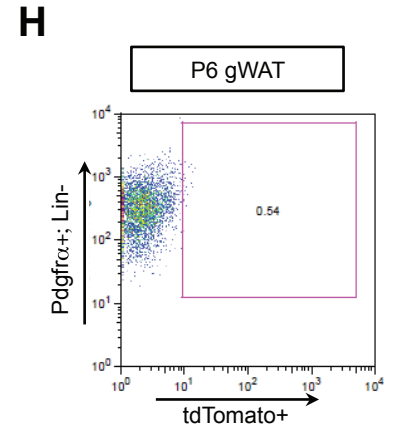

Supplementary Figure 2

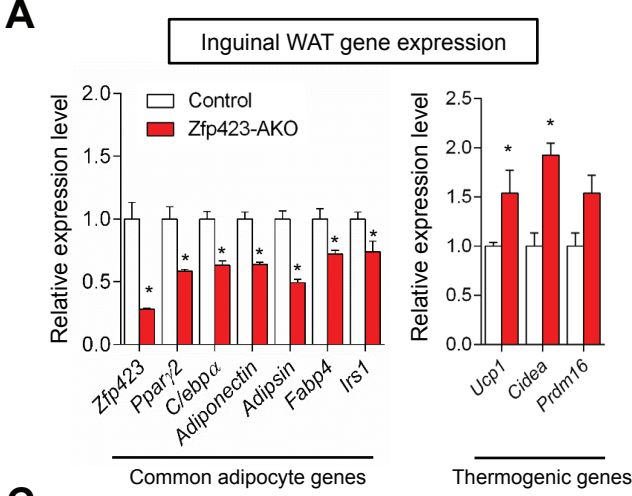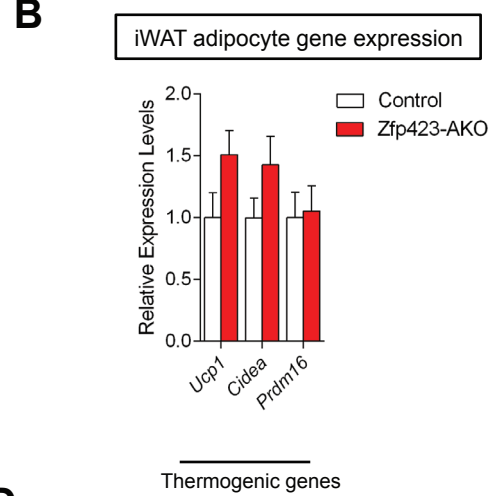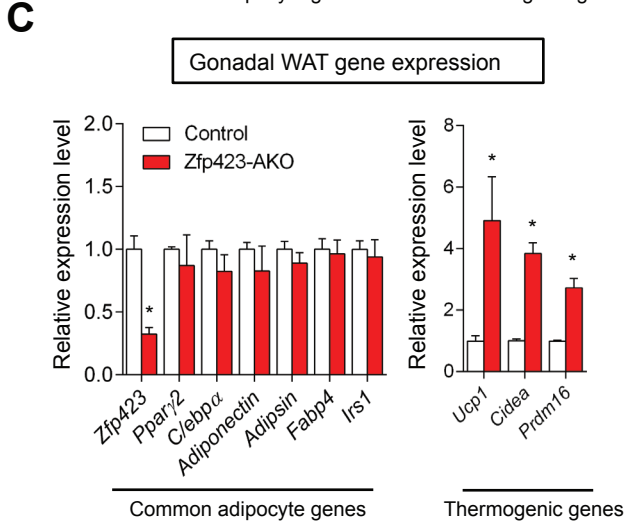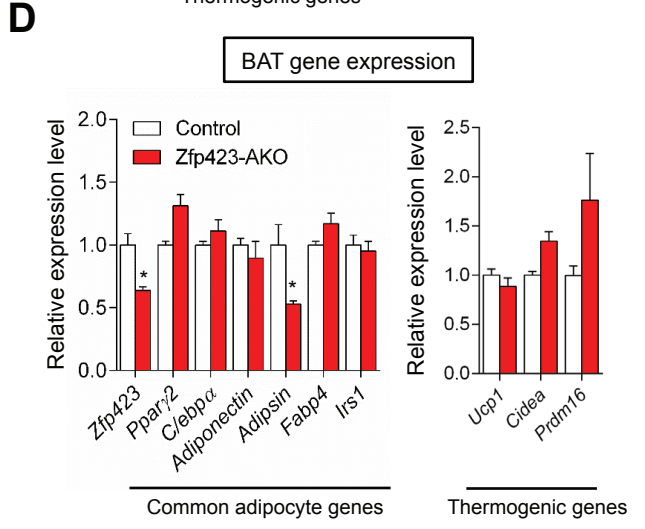

Gonadal WAT

BAT

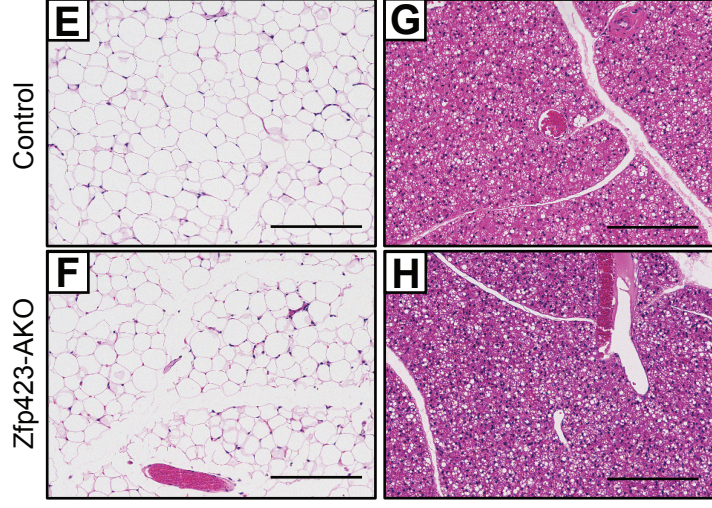

Supplementary Figure 3

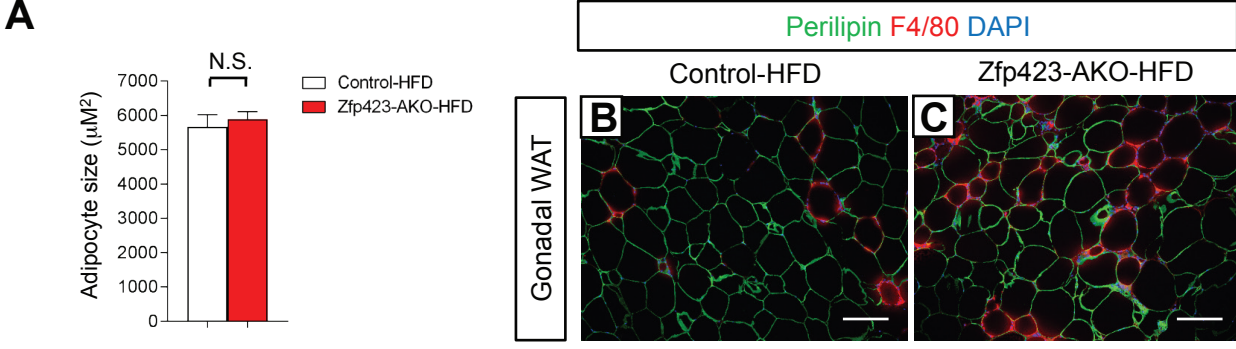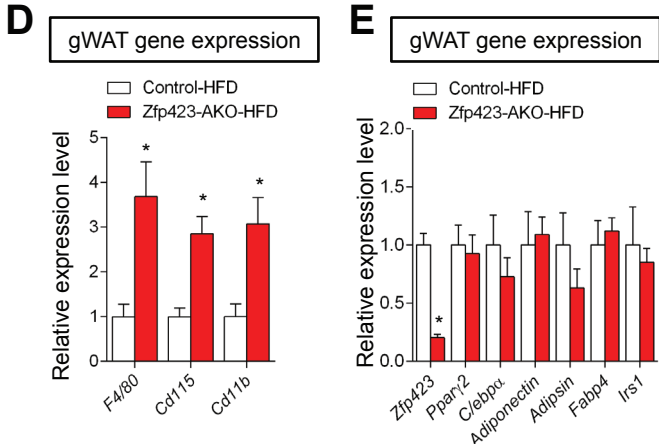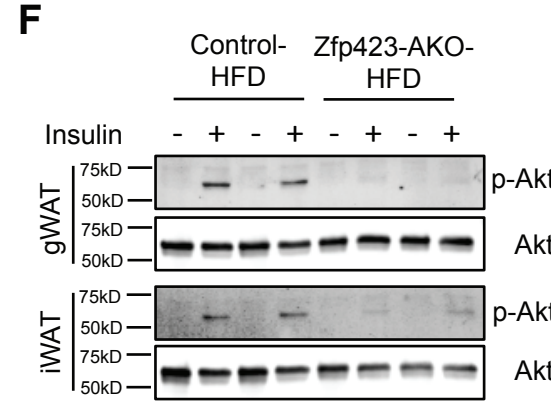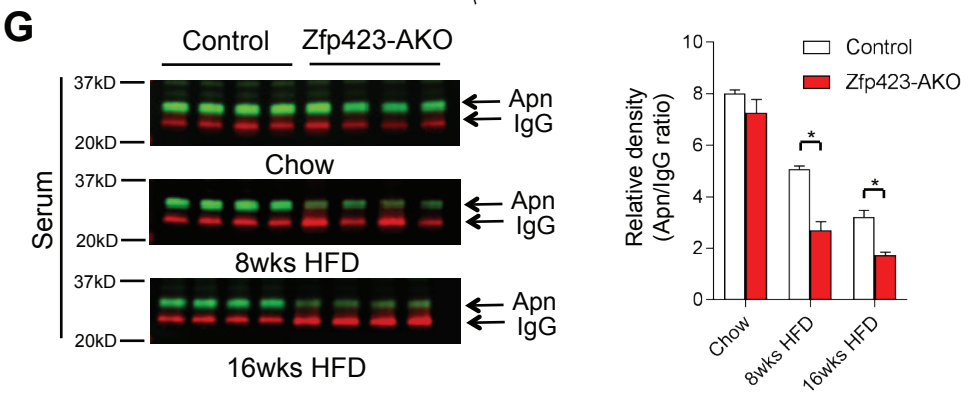

Supplementary Figure 4



**A**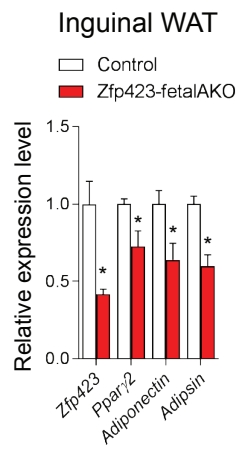**B**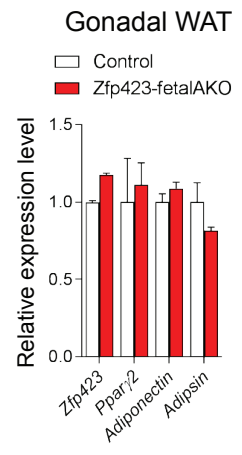**C**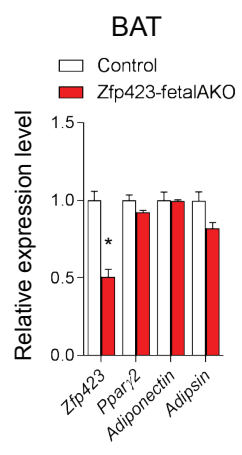**Inguinal WAT****Gonadal WAT****BAT**

Control

Zfp423-fetalAKO

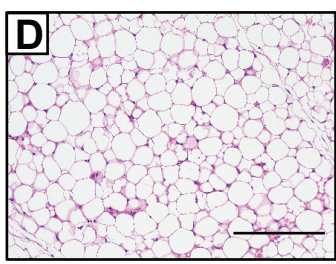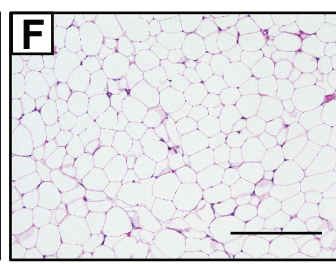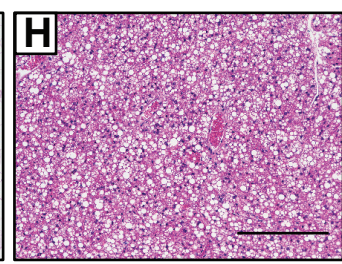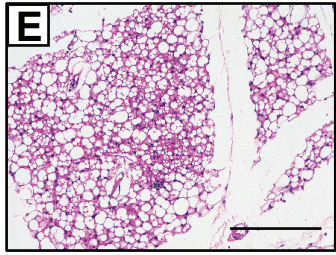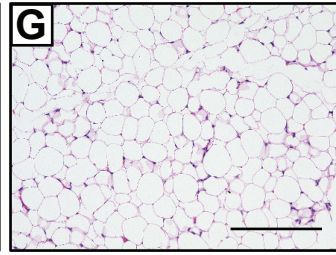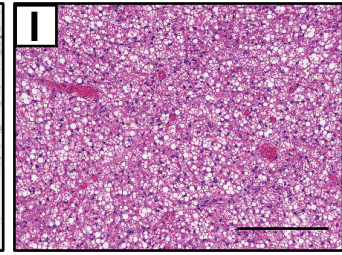

Supplementary Figure 5
